# Supplementary material for: Internal neural states influence the short-term effect of monocular deprivation in human adults
Source: eLife. 2023 Jan 27;12:e83815. doi: 10.7554/eLife.83815 (PMC9910827; doi:10.7554/eLife.83815)
Supplement: Figure 1—source data 1. [file elife-83815-fig1-data1.xlsx]

## Sheet: Figure 1a
				Amplitude (μV)					Standard error
		Hz		2 eye open	2 eye closed	PE open	PE closed		2 eye open	2 eye closed	PE open	PE closed
		2		3.4788	3.23244	3.04038	3.09361		0.210362	0.195482	0.157327	0.145215
		2.14286		3.25648	3.14075	2.93959	2.98095		0.191956	0.185614	0.138341	0.151417
		2.28571		3.12889	2.96361	2.82761	2.87902		0.161318	0.176662	0.129303	0.11845
		2.42857		2.99769	2.87727	2.76031	2.83182		0.15147	0.170111	0.117613	0.145471
		2.57143		2.92231	2.73911	2.57631	2.65912		0.159429	0.141423	0.125682	0.129919
		2.71429		2.74205	2.65642	2.51097	2.60091		0.14704	0.146875	0.0977198	0.127951
		2.85714		2.65238	2.55714	2.38675	2.49019		0.134876	0.152308	0.117811	0.130621
		3		2.5937	2.51211	2.2715	2.33857		0.148055	0.142961	0.111973	0.110998
		3.14286		2.52886	2.40725	2.21579	2.29993		0.133693	0.11795	0.104241	0.113011
		3.28571		2.44982	2.41392	2.22712	2.21841		0.143431	0.125471	0.0969882	0.104662
		3.42857		2.42803	2.33799	2.16342	2.23011		0.133255	0.11935	0.0922634	0.0979337
		3.57143		2.40743	2.33452	2.16769	2.21647		0.140079	0.130217	0.106663	0.102168
		3.71429		2.40076	2.31424	2.1326	2.20497		0.151506	0.131941	0.107664	0.105057
		3.85714		2.38222	2.36005	2.17384	2.17235		0.156421	0.135813	0.109537	0.106025
		4		2.21126	2.31372	2.07859	2.17328		0.126131	0.144007	0.102285	0.114005
		4.14286		2.30656	2.26695	2.08004	2.05543		0.151073	0.136085	0.127525	0.106843
		4.28571		2.17499	2.22686	2.05626	2.09786		0.131487	0.121184	0.119964	0.126369
		4.42857		2.325	2.20405	2.06978	2.0552		0.14098	0.130437	0.114171	0.0993067
		4.57143		2.18304	2.19399	1.9406	2.078		0.160679	0.147208	0.0905424	0.116215
		4.71429		2.24732	2.25011	2.03296	2.07673		0.146156	0.136936	0.110994	0.133954
		4.85714		2.18022	2.28399	2.01756	2.03339		0.145847	0.148577	0.104573	0.102789
		5		2.20192	2.2786	1.94722	2.00737		0.15484	0.143492	0.0844685	0.109247
		5.14286		2.23531	2.21353	1.94172	2.01145		0.149503	0.142294	0.10482	0.116659
		5.28571		2.18118	2.25958	1.94664	2.04696		0.169122	0.140497	0.100995	0.131314
		5.42857		2.19636	2.25456	1.95686	2.0403		0.162308	0.159863	0.121092	0.141601
		5.57143		2.13444	2.24966	1.96361	2.01203		0.142138	0.156762	0.135187	0.15113
		5.71429		2.22131	2.24084	1.86871	2.05624		0.156657	0.175992	0.123909	0.153756
		5.85714		2.18255	2.22859	1.9013	2.00297		0.152914	0.174518	0.115104	0.143675
		6		2.17349	2.24335	1.81529	1.91418		0.140152	0.155916	0.100936	0.120954
		6.14286		2.18297	2.26635	1.885	1.9543		0.176303	0.166098	0.114409	0.118646
		6.28571		2.14866	2.30249	1.83537	1.97728		0.153193	0.169333	0.108541	0.135547
		6.42857		2.16773	2.29208	1.8897	2.05089		0.17801	0.176928	0.11304	0.139673
		6.57143		2.26475	2.31643	1.88656	2.02201		0.195088	0.184796	0.124155	0.145735
		6.71429		2.375	2.33349	1.97482	2.04984		0.236241	0.193207	0.153856	0.152673
		6.85714		2.37565	2.4714	2.00939	2.20964		0.23465	0.215891	0.150994	0.2195
		7		2.3795	2.52979	2.05384	2.20866		0.244744	0.244262	0.163615	0.19944
		7.14286		2.51001	2.57048	2.01687	2.17598		0.258387	0.238492	0.15383	0.187994
		7.28571		2.56585	2.57734	2.02826	2.22887		0.279033	0.258647	0.162902	0.201767
		7.42857		2.64899	2.76178	2.02951	2.29287		0.28771	0.262048	0.153729	0.206322
		7.57143		2.77399	2.85804	2.09222	2.26159		0.32257	0.2987	0.16909	0.20004
		7.71429		2.77768	2.91843	2.15139	2.36389		0.305466	0.299129	0.183309	0.22263
		7.85714		2.86714	3.03293	2.18887	2.41314		0.324256	0.317749	0.194061	0.232637
		8		2.90475	3.29867	2.23328	2.45211		0.306961	0.391831	0.22324	0.246779
		8.14286		3.09481	3.19863	2.30466	2.45947		0.351473	0.334829	0.22503	0.258293
		8.28571		3.33903	3.5365	2.33311	2.62705		0.409429	0.397073	0.267009	0.323157
		8.42857		3.50331	3.82701	2.40754	2.87418		0.460563	0.46321	0.284674	0.358135
		8.57143		3.78503	4.18227	2.5695	2.92743		0.509552	0.51498	0.289203	0.401028
		8.71429		4.15143	4.55837	2.6326	2.96454		0.622084	0.608638	0.324213	0.411287
		8.85714		4.27388	4.83637	2.87217	3.15888		0.625254	0.674648	0.389504	0.427107
		9		4.63251	5.43466	2.88573	3.20006		0.667369	0.791475	0.395803	0.39207
		9.14286		5.03704	5.58542	2.89507	3.40439		0.746381	0.79399	0.381053	0.44049
		9.28571		4.97442	5.99899	3.0328	3.57862		0.661833	0.844645	0.394951	0.428136
		9.42857		5.44104	6.54138	3.18344	3.78871		0.774147	0.887933	0.433481	0.474106
		9.57143		5.62427	6.62843	3.44113	3.87306		0.743405	0.892324	0.462888	0.458869
		9.71429		6.62185	7.23679	3.49341	4.31495		0.947559	0.911372	0.464844	0.532403
		9.85714		6.82464	7.50207	3.67968	4.44846		0.945959	0.86437	0.480174	0.530888
		10		7.29223	7.76638	3.63945	4.55936		1.0172	0.970962	0.436577	0.551233
		10.1429		7.6641	8.38536	3.65335	4.69823		1.04322	1.10826	0.437226	0.567198
		10.2857		7.64906	8.40695	3.73493	4.695		0.962473	1.05155	0.477444	0.582416
		10.4286		7.44605	8.3377	3.61708	4.71657		0.858515	0.95254	0.453699	0.630338
		10.5714		7.55393	7.97168	3.70493	4.62148		0.843604	0.917176	0.485019	0.618013
		10.7143		7.36482	7.35494	3.82041	4.69463		0.875614	0.874248	0.578547	0.729426
		10.8571		7.23548	7.12659	3.79966	4.44752		0.905422	0.833665	0.597846	0.664094
		11		6.66132	6.63978	3.81264	4.38239		0.851462	0.792403	0.663239	0.677699
		11.1429		6.33258	6.19439	3.45016	4.2151		0.889027	0.768511	0.55391	0.648486
		11.2857		5.83052	5.87826	3.35612	3.80932		0.810824	0.778793	0.559038	0.617717
		11.4286		5.23189	5.65672	3.12919	3.81865		0.669557	0.83733	0.477552	0.635058
		11.5714		4.65554	5.22698	2.93863	3.44094		0.533392	0.690826	0.422877	0.546832
		11.7143		4.147	4.85722	2.70387	3.30756		0.479323	0.612122	0.355736	0.496088
		11.8571		3.89634	4.29217	2.58033	2.95717		0.43192	0.493946	0.323612	0.402033
		12		3.78963	3.93427	2.50465	2.76553		0.437531	0.418219	0.30554	0.372321
		12.1429		3.48499	3.62995	2.34923	2.6002		0.375417	0.374218	0.294388	0.313643
		12.2857		3.08989	3.28099	2.34244	2.54021		0.316965	0.312212	0.288056	0.294375
		12.4286		2.90369	3.14662	2.2143	2.36165		0.282438	0.32698	0.263082	0.263002
		12.5714		2.6997	2.81167	2.14192	2.22952		0.250678	0.26533	0.242945	0.241695
		12.7143		2.48761	2.68592	1.99031	2.19678		0.218464	0.258784	0.209182	0.229791
		12.8571		2.35376	2.37418	1.87822	2.02525		0.210115	0.198889	0.176569	0.199954
		13		2.27687	2.31418	1.82978	1.85905		0.219224	0.204943	0.184612	0.161066
		13.1429		2.08624	2.12384	1.72099	1.80721		0.187788	0.190962	0.14402	0.164145
		13.2857		1.96443	2.05	1.65871	1.73328		0.159734	0.175622	0.135399	0.142564
		13.4286		1.87518	1.96349	1.59257	1.6358		0.14354	0.164539	0.128893	0.127677
		13.5714		1.79819	1.82906	1.5594	1.63617		0.14351	0.143583	0.113856	0.129214
		13.7143		1.73683	1.78236	1.50423	1.53927		0.13738	0.136471	0.115279	0.117058
		13.8571		1.63797	1.73614	1.42825	1.47603		0.111834	0.128306	0.108276	0.097993
		14		1.59607	1.6443	1.41726	1.4326		0.111018	0.119355	0.105328	0.100298
		14.1429		1.55172	1.62566	1.38865	1.43264		0.103222	0.116112	0.0994638	0.0969531
		14.2857		1.53524	1.53763	1.3593	1.384		0.108052	0.114822	0.0924913	0.0872369
		14.4286		1.49802	1.53531	1.34447	1.34667		0.10363	0.102833	0.0933611	0.0943172
		14.5714		1.45072	1.51648	1.30557	1.34432		0.0984897	0.100195	0.0833124	0.0879099
		14.7143		1.42602	1.49671	1.25338	1.30975		0.0893754	0.0947599	0.081577	0.0840669
		14.8571		1.42025	1.45812	1.25165	1.28879		0.0934161	0.0918433	0.0765061	0.0839941
		15		1.37218	1.44823	1.2227	1.28802		0.0838097	0.0959802	0.0768644	0.0842489
		15.1429		1.41005	1.43025	1.24935	1.23055		0.0864558	0.0838912	0.0779031	0.0768038
		15.2857		1.41023	1.40727	1.20227	1.25576		0.089097	0.0865082	0.0689707	0.0798645
		15.4286		1.35791	1.37975	1.20245	1.24183		0.0826322	0.0888769	0.0701766	0.0788323
		15.5714		1.34065	1.3807	1.17001	1.2382		0.0812191	0.0841385	0.0653715	0.0783622
		15.7143		1.35302	1.39832	1.16911	1.2169		0.0785884	0.0786826	0.069666	0.0739394
		15.8571		1.31049	1.39573	1.18097	1.222		0.0821565	0.0841307	0.0690484	0.0793654
		16		1.38035	1.38776	1.15144	1.20303		0.0913614	0.0852846	0.0718718	0.0762907
		16.1429		1.3379	1.37119	1.15274	1.1963		0.075228	0.0797367	0.0671823	0.0768558
		16.2857		1.3635	1.36333	1.13158	1.1702		0.0893272	0.0810077	0.0657137	0.0702971
		16.4286		1.30503	1.35696	1.12548	1.1739		0.0802316	0.0834301	0.0730289	0.0791562
		16.5714		1.30822	1.40103	1.13114	1.16865		0.0861969	0.0934446	0.07612	0.0792122
		16.7143		1.30297	1.39258	1.15134	1.20203		0.0862526	0.0914572	0.0754917	0.0803072
		16.8571		1.33517	1.40965	1.14362	1.2032		0.092411	0.0938366	0.0712651	0.0881099
		17		1.36011	1.42443	1.14707	1.20486		0.096645	0.0970406	0.0713762	0.0872953
		17.1429		1.3531	1.40304	1.14963	1.1938		0.08996	0.0926049	0.0730712	0.0856197
		17.2857		1.31484	1.45372	1.1083	1.18342		0.0881797	0.106592	0.0639112	0.0853792
		17.4286		1.31767	1.41684	1.144	1.16683		0.0916224	0.100376	0.0675905	0.0783702
		17.5714		1.3296	1.43699	1.13883	1.20783		0.0870178	0.0882046	0.0724338	0.0906975
		17.7143		1.3573	1.45137	1.10817	1.18867		0.096048	0.11231	0.0701708	0.0807516
		17.8571		1.3704	1.46618	1.12306	1.19904		0.101533	0.0990248	0.073042	0.0867358
		18		1.36323	1.47546	1.13532	1.18195		0.0938943	0.10429	0.0770695	0.0942968
		18.1429		1.34241	1.50134	1.15074	1.20014		0.091759	0.103098	0.0751118	0.0813525
		18.2857		1.41959	1.52782	1.1225	1.20918		0.104528	0.112167	0.0740093	0.0816824
		18.4286		1.41173	1.51603	1.13673	1.22793		0.0956023	0.11139	0.0754694	0.0848704
		18.5714		1.4441	1.5258	1.1439	1.20961		0.104237	0.1104	0.075689	0.0828335
		18.7143		1.42223	1.52266	1.12328	1.22471		0.102702	0.101313	0.0743981	0.0852073
		18.8571		1.47053	1.57583	1.12831	1.22553		0.104038	0.118679	0.0762186	0.0781269
		19		1.47885	1.62885	1.14865	1.23981		0.107842	0.110671	0.0777108	0.0886692
		19.1429		1.5081	1.64056	1.21666	1.22076		0.104969	0.110825	0.0915045	0.0754756
		19.2857		1.51865	1.64328	1.1507	1.27325		0.112525	0.111514	0.0770169	0.0937267
		19.4286		1.56109	1.61949	1.16	1.24392		0.118207	0.115988	0.0860886	0.0912859
		19.5714		1.57478	1.67248	1.19174	1.26002		0.117472	0.127648	0.0913765	0.102768
		19.7143		1.59427	1.7052	1.1643	1.27117		0.124243	0.122119	0.0836652	0.101505
		19.8571		1.59594	1.67442	1.20381	1.25388		0.127977	0.129923	0.102926	0.0966415
		20		1.63782	1.68433	1.17806	1.25066		0.138433	0.130807	0.0948434	0.0865623
		20.1429		1.58791	1.74108	1.17507	1.27797		0.124898	0.134453	0.101876	0.0958247
		20.2857		1.5809	1.74396	1.16751	1.24793		0.126861	0.14298	0.100079	0.0946367
		20.4286		1.61398	1.71556	1.19485	1.31638		0.129372	0.139353	0.0927419	0.106093
		20.5714		1.60743	1.71711	1.14294	1.26593		0.115835	0.142699	0.0968847	0.106583
		20.7143		1.57993	1.67345	1.17118	1.27818		0.127	0.13875	0.102464	0.115404
		20.8571		1.59428	1.68134	1.15751	1.29281		0.124145	0.132453	0.103317	0.101642
		21		1.58269	1.61939	1.16028	1.27605		0.122091	0.124528	0.106832	0.105918
		21.1429		1.55763	1.5862	1.13272	1.20438		0.118483	0.122715	0.0978456	0.0998186
		21.2857		1.51117	1.59816	1.11508	1.19342		0.124028	0.122966	0.0962216	0.100701
		21.4286		1.52049	1.56126	1.12644	1.21362		0.132054	0.121691	0.105201	0.102414
		21.5714		1.49973	1.48711	1.1121	1.23562		0.133169	0.109412	0.101439	0.111133
		21.7143		1.46878	1.45847	1.12243	1.1302		0.136193	0.112855	0.113358	0.0969994
		21.8571		1.46762	1.42435	1.10256	1.17129		0.15717	0.109721	0.109829	0.111552
		22		1.40104	1.40079	1.06281	1.16232		0.140718	0.113617	0.103344	0.110061
		22.1429		1.39098	1.38501	1.08475	1.13617		0.162912	0.124459	0.105883	0.122127
		22.2857		1.37499	1.38835	1.07256	1.11064		0.154302	0.147703	0.1176	0.126166
		22.4286		1.34944	1.37409	1.06577	1.11296		0.148893	0.156725	0.108756	0.1291
		22.5714		1.31	1.3814	1.03695	1.0788		0.130019	0.207699	0.108691	0.129383
		22.7143		1.24035	1.3033	1.01443	1.07913		0.0957612	0.157555	0.0998327	0.115142
		22.8571		1.19262	1.29466	0.991675	1.07802		0.0812895	0.174052	0.0891031	0.12781
		23		1.14247	1.27329	0.948251	1.02871		0.0804902	0.157238	0.0660815	0.103855
		23.1429		1.11057	1.21557	0.967506	1.01031		0.0712906	0.126953	0.0725008	0.0908213
		23.2857		1.10009	1.16488	0.927504	0.993383		0.0719581	0.0982902	0.0635958	0.0826776
		23.4286		1.07754	1.13744	0.93747	0.955728		0.0639657	0.0997256	0.0658398	0.0727617
		23.5714		1.03434	1.1179	0.92149	0.952306		0.0539343	0.088275	0.0581141	0.0758322
		23.7143		1.0145	1.07119	0.9241	0.918183		0.0563178	0.0668478	0.0628229	0.0621789
		23.8571		1.03766	1.05984	0.899785	0.915581		0.0576157	0.0688004	0.0560136	0.062116
		24		0.990381	1.04896	0.89234	0.89158		0.0542306	0.0622889	0.0550783	0.0541855
		24.1429		0.980128	0.988024	0.878659	0.882266		0.0498729	0.0560552	0.0546386	0.0534709
		24.2857		0.96702	1.00428	0.86336	0.859019		0.0560897	0.0597532	0.054944	0.04994
		24.4286		0.954331	0.959089	0.868125	0.873764		0.0533837	0.0567318	0.0535149	0.0492898
		24.5714		0.937439	0.954326	0.843322	0.850848		0.0496919	0.0569042	0.0499857	0.0476506
		24.7143		0.92138	0.943091	0.841677	0.861395		0.0478571	0.0547384	0.0450687	0.0529145
		24.8571		0.872625	0.900686	0.855737	0.840562		0.0458271	0.0503478	0.0502982	0.0458403
		25		0.892496	0.898966	0.804213	0.826288		0.0464881	0.04489	0.0418897	0.0436921
		25.1429		0.88556	0.903182	0.812571	0.817149		0.0438963	0.0512094	0.0391225	0.0417161
		25.2857		0.867879	0.871707	0.805931	0.810447		0.0455773	0.0497261	0.0456119	0.0460885
		25.4286		0.849337	0.852351	0.785782	0.798663		0.0443716	0.0472024	0.0412842	0.0452173
		25.5714		0.835898	0.867683	0.792453	0.793946		0.048114	0.0467888	0.0452121	0.041492
		25.7143		0.838838	0.835276	0.779329	0.78078		0.0439989	0.0436548	0.0423584	0.0398578
		25.8571		0.8352	0.833877	0.7751	0.793149		0.0429795	0.0513363	0.0417717	0.0420393
		26		0.830459	0.813786	0.77567	0.757362		0.0528219	0.043103	0.042207	0.0378456
		26.1429		0.812166	0.818688	0.768417	0.776278		0.0485606	0.049019	0.0454775	0.0401654
		26.2857		0.812602	0.808584	0.76598	0.787163		0.0449387	0.0428011	0.0428688	0.0420312
		26.4286		0.798227	0.795253	0.76124	0.747926		0.0453575	0.0451383	0.0406732	0.0400808
		26.5714		0.790887	0.798816	0.757847	0.745292		0.0474994	0.047078	0.0412953	0.0403173
		26.7143		0.792941	0.79388	0.763979	0.756483		0.0470537	0.0432611	0.0446214	0.0460896
		26.8571		0.783649	0.7971	0.739867	0.746314		0.043237	0.0464309	0.0358987	0.0369251
		27		0.76522	0.785621	0.736472	0.748374		0.0459572	0.0464422	0.0398689	0.0421958
		27.1429		0.764153	0.768307	0.752227	0.736641		0.043282	0.0486296	0.0433741	0.041731
		27.2857		0.768339	0.782588	0.751623	0.744106		0.0460293	0.0438907	0.0446252	0.0442417
		27.4286		0.768948	0.777076	0.744105	0.74255		0.0463676	0.0454137	0.0428811	0.0426867
		27.5714		0.76871	0.782688	0.743391	0.741494		0.0477144	0.0473503	0.043668	0.04224
		27.7143		0.766036	0.762171	0.721147	0.728345		0.0410799	0.042416	0.0431571	0.0404561
		27.8571		0.752926	0.765366	0.716607	0.722597		0.043203	0.0475784	0.0431843	0.0423452
		28		0.749426	0.77296	0.738017	0.731584		0.0423779	0.0456328	0.0470446	0.0466887
		28.1429		0.757435	0.776328	0.74451	0.716243		0.0463812	0.0495268	0.0466268	0.0432104
		28.2857		0.719896	0.748829	0.716814	0.721977		0.0383971	0.04189	0.0436904	0.040747
		28.4286		0.742511	0.755296	0.707003	0.720419		0.0394035	0.0465628	0.0380478	0.0434803
		28.5714		0.731584	0.75712	0.70834	0.709451		0.039116	0.0482916	0.0387228	0.0420376
		28.7143		0.720235	0.732194	0.699018	0.715584		0.0400446	0.0431945	0.0427644	0.0373534
		28.8571		0.712393	0.733151	0.6933	0.699504		0.037933	0.0449797	0.036842	0.039535
		29		0.71102	0.735084	0.694492	0.69313		0.0362515	0.0394386	0.0374894	0.0377237
		29.1429		0.716739	0.72544	0.688991	0.67882		0.0376286	0.0417707	0.0393463	0.0343393
		29.2857		0.7082	0.730668	0.686965	0.681284		0.0361108	0.0438415	0.0353669	0.0351362
		29.4286		0.708285	0.717515	0.678619	0.679014		0.0369181	0.0415714	0.0367431	0.0391422
		29.5714		0.709107	0.706939	0.675446	0.67633		0.0370685	0.0389915	0.0380398	0.0397479
		29.7143		0.696992	0.721896	0.669917	0.684585		0.030879	0.0421246	0.0359696	0.0356139
		29.8571		0.692661	0.713629	0.664045	0.659702		0.0310414	0.0388218	0.0377893	0.0369325
		30		0.696717	0.720316	0.661803	0.676149		0.0390845	0.0413382	0.0393175	0.038259
