# Supplementary material for: Internal neural states influence the short-term effect of monocular deprivation in human adults
Source: eLife. 2023 Jan 27;12:e83815. doi: 10.7554/eLife.83815 (PMC9910827; doi:10.7554/eLife.83815)
Supplement: Figure 1—source data 2. [file elife-83815-fig1-data2.xlsx]

## Sheet: Figure 1b
		Normalized amplitude (μV)
		2 eye open	2 eye closed	PE open	PE closed
		8.0455	8.60473	7.32417	7.37312
		8.14967	7.72425	6.91007	8.56352
		8.80936	10.1491	5.71494	6.67414
		10.3171	10.2591	5.36438	5.40695
		8.55864	12.4299	3.86232	6.49665
		10.5516	9.48642	4.52856	6.78089
		8.95834	10.2618	6.24721	5.88018
		12.42	12.3021	3.64126	2.98411
		12.5564	13.8054	1.92767	3.05804
		11.982	12.8433	2.54467	3.97752
		10.3885	11.5682	3.9516	5.43921
		9.15854	9.88307	5.46122	6.84468
		10.4562	8.91536	6.13965	5.83625
		8.06669	7.81218	6.33417	9.13448
		9.72315	12.386	2.54086	6.69752
		8.54785	9.43587	6.31316	7.05063
		8.81507	8.98845	6.77034	6.77365
		11.9411	12.2417	2.47411	4.69057
		11.9419	12.0233	3.93639	3.44588
		9.43381	9.9393	5.23329	6.74111
