# Supplementary material for: Internal neural states influence the short-term effect of monocular deprivation in human adults
Source: eLife. 2023 Jan 27;12:e83815. doi: 10.7554/eLife.83815 (PMC9910827; doi:10.7554/eLife.83815)
Supplement: Figure 1—source data 3. [file elife-83815-fig1-data3.xlsx]

## Sheet: Figure 1c
		Normalized amplitude (μV)
		ssvep		alpha
		PE open	PE closed	PE open	PE closed
		3.32708	2.06026	3.46584	3.72857
		2.56262	2.55262	2.82042	4.01115
		1.66277	1.64673	3.00915	4.04137
		1.87059	1.09459	3.39753	3.58929
		2.74562	1.70706	2.77238	5.4434
		1.39641	0.967183	3.17115	4.96129
		3.88352	3.34084	3.34171	4.16624
		2.8275	2.87117	3.35528	2.85955
		5.00909	3.37184	3.55502	3.30831
		2.38885	1.98605	3.17368	3.5792
		2.92372	2.89044	3.52684	3.04995
		2.7132	1.93305	3.34545	3.41592
		2.19838	2.31574	3.18556	3.52967
		2.8624	2.68389	3.0735	3.35302
		2.44128	2.6312	2.35672	4.97457
		2.67534	2.59525	2.84656	4.46728
		2.30581	1.97218	3.88557	3.81184
		5.17236	4.91322	3.17833	4.06692
		1.78139	2.56772	4.09046	3.49878
		2.50935	2.37955	3.77446	3.27813
