# Supplementary material for: Internal neural states influence the short-term effect of monocular deprivation in human adults
Source: eLife. 2023 Jan 27;12:e83815. doi: 10.7554/eLife.83815 (PMC9910827; doi:10.7554/eLife.83815)
Supplement: Figure 1—source data 4. [file elife-83815-fig1-data4.xlsx]

## Sheet: Figure 1d
		Contrast sensitivity
		PE open	PE closed
		65.7558	56.8721
		82.7148	84.2889
		62.6431	61.9499
		59.0124	59.1237
		81.0582	77.8122
		59.3512	61.4747
		37.4072	36.7997
		77.0781	59.8155
		89.5924	85.3528
		39.9222	36.9312
		93.1705	72.7976
		64.1617	56.6609
		55.3339	46.1351
		55.3603	62.0041
		40.8117	33.4864
		59.4861	53.0132
		50.2705	57.5591
		74.0634	58.482
