# Supplementary material for: Internal neural states influence the short-term effect of monocular deprivation in human adults
Source: eLife. 2023 Jan 27;12:e83815. doi: 10.7554/eLife.83815 (PMC9910827; doi:10.7554/eLife.83815)
Supplement: Figure 2—source data 1. [file elife-83815-fig2-data1.xlsx]

## Sheet: Figure 2
		Figure 2a			Figure 2b			Figure 2c			Figure 2d
		Contrast sensitivity	SSVEP		αSSVEP	αBi		αBi	αmono		αSSVEP	αmono
		-0.135101	-0.326857		0.0758059	0.069508		0.069508	0.00668237		0.0758059	0.00668237
		0.0190309	-0.0113817		0.422185	-0.0522006		-0.0522006	0.239281		0.422185	0.239281
		0.00188491	-0.00389914		0.343024	0.152077		0.152077	0.167839		0.343024	0.167839
		0.0357792	0.44141		0.0564434	-0.00562688		-0.00562688	0.00793599		0.0564434	0.00793599
		-0.0162396	-0.13974		0.963437	0.452322		0.452322	0.68206		0.963437	0.68206
		-0.218662	-0.378261		0.564507	-0.100952		-0.100952	0.49736		0.564507	0.49736
		-0.116904	-0.307378		0.24674	0.145502		0.145502	-0.0587514		0.24674	-0.0587514
		-0.16624	-0.380762		-0.147747	-0.00949684		-0.00949684	-0.180475		-0.147747	-0.180475
		0.120011	-0.00964894		-0.0693976	0.0994766		0.0994766	0.586392		-0.0693976	0.586392
		-0.179489	-0.168618		0.127774	0.0718856		0.0718856	0.563077		0.127774	0.563077
		-0.108813	0.0154426		-0.135217	0.113553		0.113553	0.376455		-0.135217	0.376455
		0.144989	-0.0501015		0.0210629	0.0791104		0.0791104	0.253325		0.0210629	0.253325
		-0.210378	-0.28754		0.108023	-0.147365		-0.147365	-0.049417		0.108023	-0.049417
					0.0909434	-0.0315508		-0.0315508	0.442096		0.0909434	0.442096
					1.1108	0.273864		0.273864	1.63592		1.1108	1.63592
					0.569361	0.103889		0.103889	0.116815		0.569361	0.116815
					-0.018973	0.0196683		0.0196683	0.000487751		-0.018973	0.000487751
					0.279577	0.0251693		0.0251693	0.895862		0.279577	0.895862
					-0.144648	0.00681458		0.00681458	-0.12461		-0.144648	-0.12461
					-0.131497	0.0535829		0.0535829	0.288121		-0.131497	0.288121
