# Supplementary material for: Internal neural states influence the short-term effect of monocular deprivation in human adults
Source: eLife. 2023 Jan 27;12:e83815. doi: 10.7554/eLife.83815 (PMC9910827; doi:10.7554/eLife.83815)
Supplement: Figure 3—source data 1. [file elife-83815-fig3-data1.xlsx]

## Sheet: Figure 3
			Open-PE				Closed-PE				Open-UPE				Closed-UPE
			Baseline	0 min	30 min		Baseline	0 min	30 min		Baseline	0 min	30 min		Baseline	0 min	30 min
			0	1.48858	0.506057		0	1.57684	-0.152167		0	-2.62725	0.763058		0	-1.89291	-1.10781
			0	0.684779	-0.119927		0	-0.39048	0.927921		0	-5.3063	-2.69216		0	-4.58439	-1.41114
			0	3.37334	-0.328852		0	2.00206	2.15243		0	-3.47568	-0.908068		0	-2.42041	-1.81332
			0	-0.353926	-1.74786		0	2.0025	1.03058		0	-1.96744	0.273484		0	-1.42634	-1.22714
			0	0.907844	-0.473703		0	1.4196	2.04932		0	-5.55763	-1.46254		0	-1.51385	-0.703154
			0	0.957798	-0.423578		0	1.06607	2.40103		0	-3.47326	-2.16187		0	-1.58165	1.73393
			0	-1.12715	0.26331		0	-1.19994	-0.982616		0	-3.84708	-3.77762		0	-2.90404	-0.284878
			0	-0.774837	0.567924		0	-0.455849	1.71811		0	-1.92738	0.278479		0	-2.17954	-1.21036
			0	-0.533205	-1.4582		0	-0.637404	-1.84704		0	-7.17559	-2.30928		0	-5.15112	-3.37239
			0	2.35867	-0.01701		0	-2.3122	-1.38382		0	-1.1209	-1.33894		0	0.0315851	0.107751
			0	0.684079	-2.59218		0	-1.30629	-1.53945		0	-5.288	-0.361691		0	-3.12166	0.483025
			0	0.420371	-0.492986		0	0.515576	0.185075		0	-0.528226	-1.22624		0	-0.766916	-0.89954
		average	0	0.673863	-0.526417		0	0.190041	0.379948		0	-3.52456	-1.24361		0	-2.2926	-0.808752
		se	0	0.361758	0.263431		0	0.397457	0.428658		0	0.555235	0.373525		0	0.410499	0.349978
