# Supplementary material for: Internal neural states influence the short-term effect of monocular deprivation in human adults
Source: eLife. 2023 Jan 27;12:e83815. doi: 10.7554/eLife.83815 (PMC9910827; doi:10.7554/eLife.83815)
Supplement: Figure 4—source data 1. [file elife-83815-fig4-data1.xlsx]

## Sheet: Figure 4
		Figure 4a										Figure 4b
			PE open				PE closed
			Baseline	0 min	30 min		Baseline	0 min	30 min				PE open	PE closed
			0	-0.468927	0.0373132		0	-0.274728	-0.0869135				-0.468927	-0.274728
			0	-0.504305	-0.259406		0	-0.372742	-0.229775				-0.504305	-0.372742
			0	-0.475168	-0.0561941		0	-0.305302	-0.280474				-0.475168	-0.305302
			0	-0.199608	0.308512		0	-0.362687	-0.25453				-0.199608	-0.362687
			0	-0.552475	-0.113242		0	-0.285297	-0.270346				-0.552475	-0.285297
			0	-0.351481	-0.159537		0	-0.237236	-0.0667482				-0.351481	-0.237236
			0	-0.284588	-0.393778		0	-0.176011	0.0826423				-0.284588	-0.176011
			0	-0.125315	-0.0330516		0	-0.189343	-0.30106				-0.125315	-0.189343
			0	-0.606919	-0.105974		0	-0.45938	-0.182558				-0.606919	-0.45938
			0	-0.407963	-0.174487		0	0.246	0.14879				-0.407963	0.246
			0	-0.484616	0.285369		0	-0.134972	0.187628				-0.484616	-0.134972
			0	-0.10258	-0.0802662		0	-0.102596	-0.0877374				-0.10258	-0.102596
		average	0	-0.380329	-0.0620617		0	-0.221191	-0.111757			average	-0.380329	-0.221191
		se	0	0.046373	0.0555768		0	0.0497809	0.0476754			se	0.046373	0.0497809
