# Supplementary material for: Internal neural states influence the short-term effect of monocular deprivation in human adults
Source: eLife. 2023 Jan 27;12:e83815. doi: 10.7554/eLife.83815 (PMC9910827; doi:10.7554/eLife.83815)
Supplement: Figure 5—source data 1. [file elife-83815-fig5-data1.xlsx]

## Sheet: Figure 5
		Figure 5a																Figure 5b
			PE open							PE closed
			Baseline	0 min	3 min	6 min	9 min	30 min		Baseline	0 min	3 min	6 min	9 min	30 min				PE open	PE closed
			0	-2.25	-2.5	-2.5	-1	-2.75		0	-2.25	-2.25	-0.25	-1	0.75				-2.0625	-1.4375
			0	-8.5	-7.25	-8.75	-4	0.75		0	1.5	-2.25	-1.25	-0.25	-1.75				-7.125	-0.5625
			0	-3.5	-3	-3.75	-5.75	0.75		0	-3.75	-3	-2	-2.5	1.75				-4	-2.8125
			0	-4.25	-8.25	-4	-7.5	-1.75		0	-7	-4.25	-4	-4.5	-1.25				-6	-4.9375
			0	-2.75	-17.25	-3.5	-4.25	0.5		0	-0.25	-0.75	-5	-5.25	0				-6.9375	-2.8125
			0	-22.75	-5.5	-6	-5.75	-3.5		0	-11	-13	-10.25	-5.5	-2.75				-10	-9.9375
			0	-5.5	-9.5	-4.5	-9.5	-3.25		0	-1.25	-2.5	-5	-7.25	-1.75				-7.25	-4
			0	-6.75	-6	-4.5	-4.5	-0.5		0	-4	-3.25	-4.25	-3.75	-2.25				-5.4375	-3.8125
			0	-4	-5.25	-2.5	-5	-1.5		0	0	-7.75	-7.75	-4.25	-1				-4.1875	-4.9375
			0	-4.25	-2	-4	-0.75	-2		0	-1.25	2	1	-1	1				-2.75	0.1875
			0	-17.75	-11.5	-7.75	-13.5	-9.5		0	2.25	-1	-4.25	-3.75	-3				-12.625	-1.6875
			0	-1	-7.5	-1.5	-1.75	-1		0	-4.75	-7	-1	0.5	0				-2.9375	-3.0625
			0	-5.75	-7.5	-14.5	-7.5	-0.25		0	-4.75	-4.25	-3.25	-4	-3.5				-8.8125	-4.0625
			0	-9	-10.75	-9	-7.25	-5.25		0	-6.5	-6.75	-7.5	-7	-8.25				-9	-6.9375
		average	0	-7	-7.41071	-5.48214	-5.57143	-2.08929		0	-3.07143	-4	-3.91071	-3.53571	-1.57143			average	-6.36607	-3.62946
		se	0	1.63537	1.08169	0.927845	0.917035	0.737816		0	0.969107	0.986864	0.837237	0.643467	0.665799			se	0.817657	0.698202
