# Supplementary material for: Internal neural states influence the short-term effect of monocular deprivation in human adults
Source: eLife. 2023 Jan 27;12:e83815. doi: 10.7554/eLife.83815 (PMC9910827; doi:10.7554/eLife.83815)
Supplement: Figure 6—source data 1. [file elife-83815-fig6-data1.xlsx]

## Sheet: Figure 6
		Figure 6a																Figure 6b
			PE open							PE closed
			Baseline	0 min	3 min	6 min	9 min	30 min		Baseline	0 min	3 min	6 min	9 min	30 min				PE open	PE closed
			0	-0.239713	-0.427823	-0.570703	-0.291738	-0.489843		0	-0.630089	-0.459849	-0.231278	-0.492674	-0.352708				-0.382494	-0.453472
			0	-0.145209	-0.257377	-0.248547	-0.0824442	-0.191849		0	-0.193401	0.0412102	-0.0593438	-0.0166418	-0.0604643				-0.183394	-0.0570442
			0	-0.628	-0.709	-0.671	-0.375	-0.39		0	-0.328	-0.236	-0.313	-0.159	-0.071				-0.59575	-0.259
			0	-0.459846	-0.411251	-0.445258	-0.37464	-0.37596		0	-0.176667	-0.410645	-0.350144	-0.560183	-0.142577				-0.422749	-0.37441
			0	-0.318283	-0.359628	-0.216387	-0.222554	-0.119336		0	-0.48815	-0.223101	-0.223101	-0.157854	-0.0935502				-0.279213	-0.273051
			0	-0.70758	-0.495192	-0.553382	-0.0891407	-0.583699		0	-0.281006	-0.251775	-0.59752	-0.336141	-0.581204				-0.461324	-0.366611
			0	-0.717	-0.575	-0.529	-0.485	-0.659		0	-0.792	-0.493	-0.5	-0.419	-0.434				-0.5765	-0.551
			0	-0.382	-0.752	-0.513	-0.637	-0.694		0	-0.561	-0.598	-0.603	-0.731	-0.587				-0.571	-0.62325
			0	-0.489	-0.712	-0.755	-0.794	-0.693		0	-0.098	-0.399	-0.336	-0.267	-0.342				-0.6875	-0.275
			0	-0.901	-0.881	-0.858	-0.766	-0.698		0	-0.211	0.073	-0.171	0.135	-0.153				-0.8515	-0.0435
			0	-0.45	-0.537	-0.444	-0.219	-0.306		0	-0.408	-0.31	-0.233	-0.286	-0.302				-0.4125	-0.30925
			0	-0.547	-0.662	-0.702	-0.64	-0.339		0	-0.679	-0.496	-0.397	-0.511	-0.486				-0.63775	-0.52075
			0	-0.353112	-0.439248	-0.192686	-0.301937	-0.0643692		0	-0.410875	-0.179252	-0.294789	-0.107917	-0.0935032				-0.321746	-0.248208
			0	-0.441553	-0.521969	-0.426743	-0.433611	-0.46134		0	-0.53837	-0.636759	-0.64139	-0.480353	-0.483447				-0.455969	-0.574218
		average	0	-0.484235	-0.552892	-0.508979	-0.408005	-0.433243		0	-0.413968	-0.327084	-0.353612	-0.313555	-0.298747			average	-0.488528	-0.352055
		se	0	0.0542628	0.0461254	0.0534816	0.0617842	0.0577157		0	0.0561378	0.0573101	0.046865	0.0632589	0.0520801			se	0.0473199	0.0479027
